# Supplementary material for: Identification of second primary tumors from lung metastases in patients with esophageal squamous cell carcinoma using whole-exome sequencing
Source: PubMed Central journal article supplement (PMC7482800; doi:10.7150/thno.45311), 2020-08-25
Supplement: thnov10p10606s1.pdf [file thnov10p10606s1.pdf]

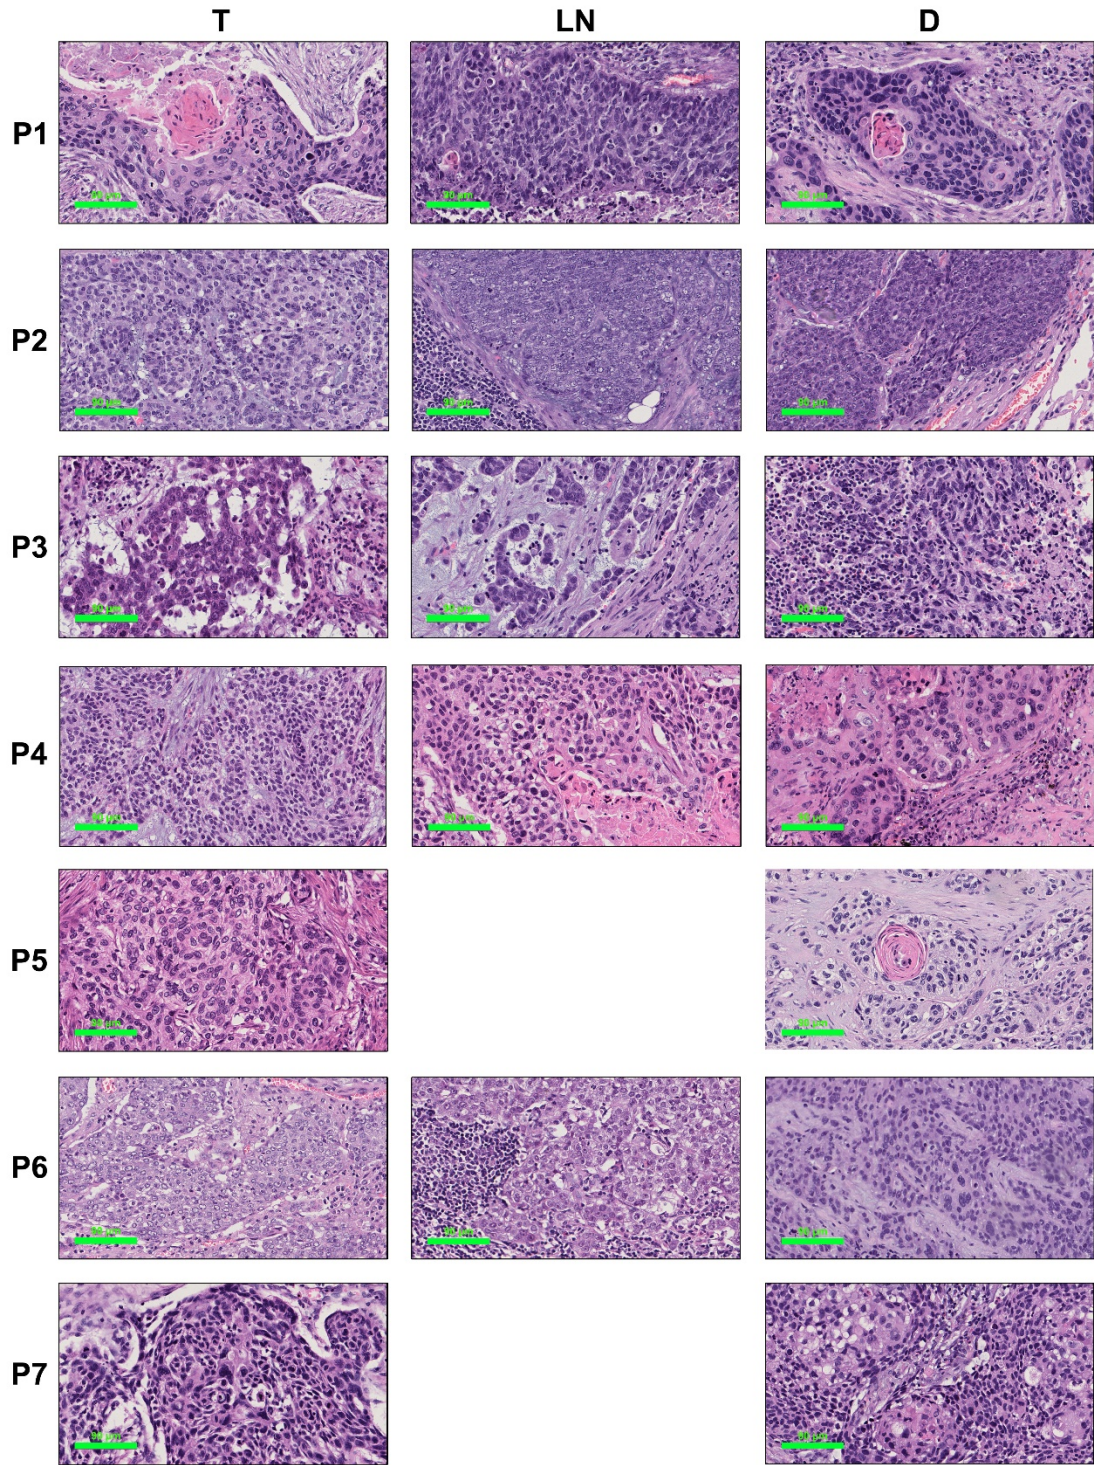

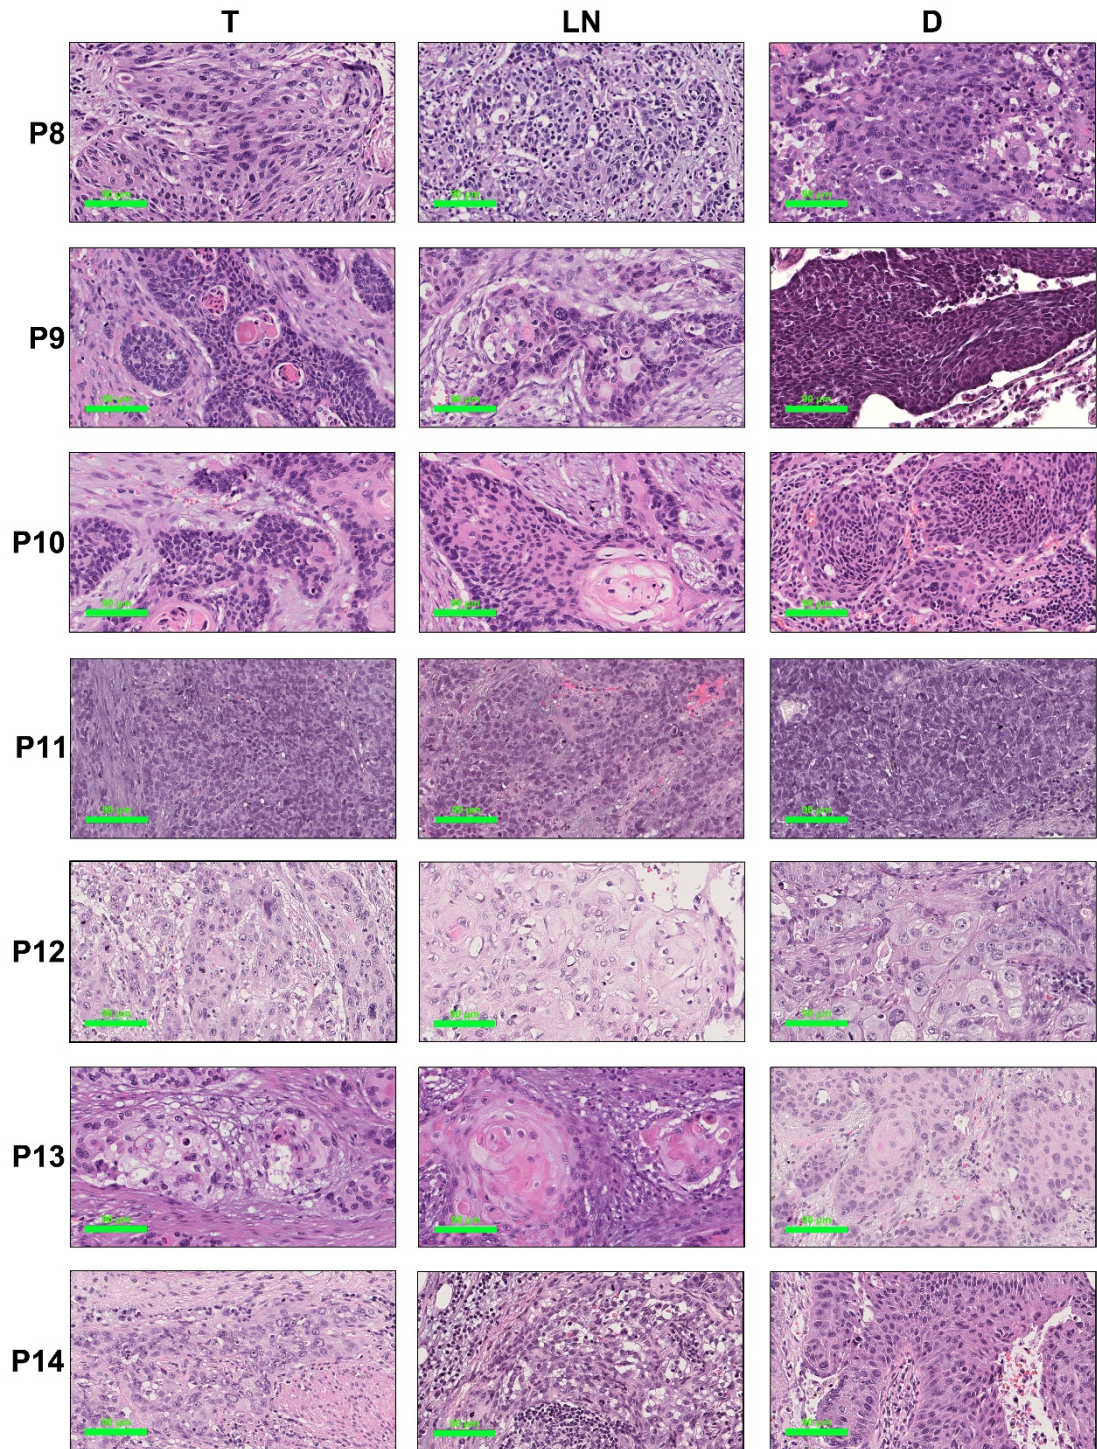

**Figure S1.** Representative histological morphology (magnification: 200×) of esophageal tumor (T), lung, brain, or kidney tumor (D) and lymph node metastasis (LN) from 14 patients. Bar, 90 μm.

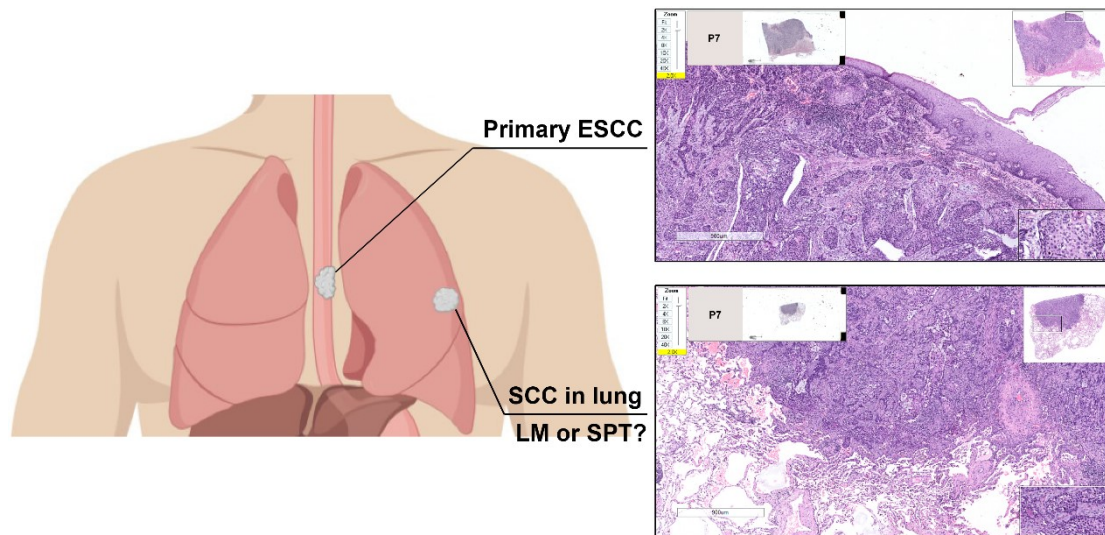

**Figure S2.** A schematic graph showing the anatomic sites and representative H&E staining of double esophageal and lung squamous cell carcinomas (SCCs), which is a clinical dilemma to accurately discriminate between lung metastasis (LM) and second primary tumors (SPTs). ESCC, esophageal squamous cell carcinoma. Bar, 900  $\mu\text{m}$ .

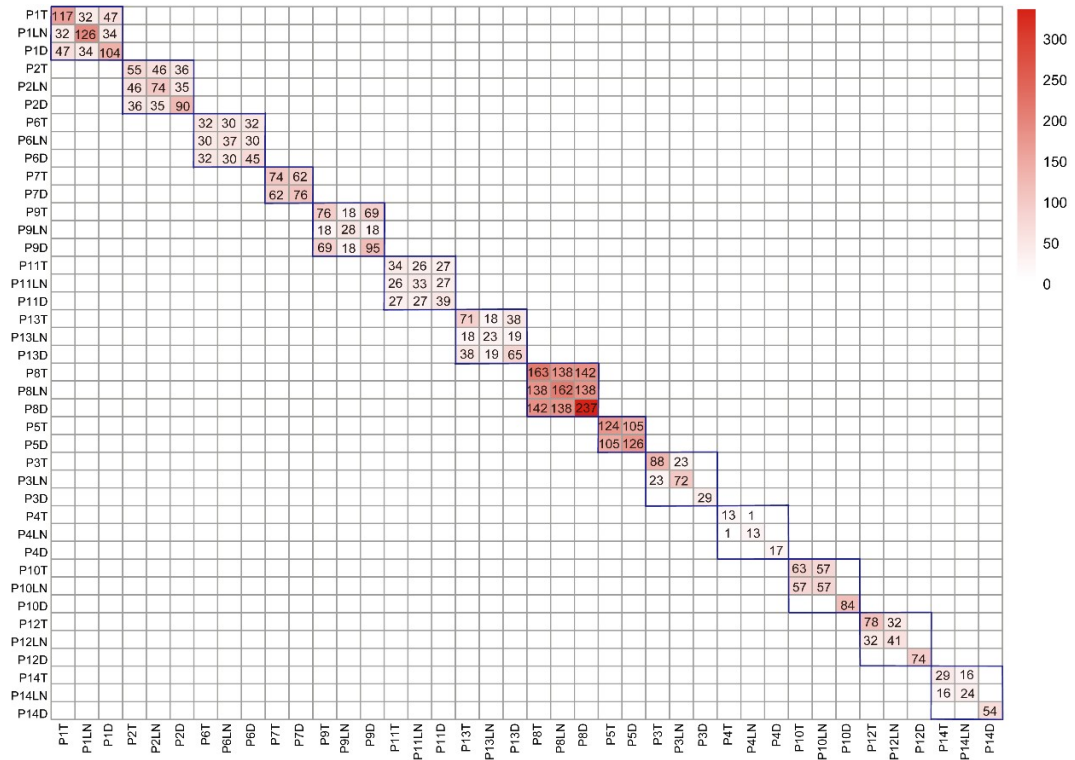

**Figure S3.** Heatmap of shared nonsynonymous somatic mutations between different tumors from 14 patients with double SCCs.

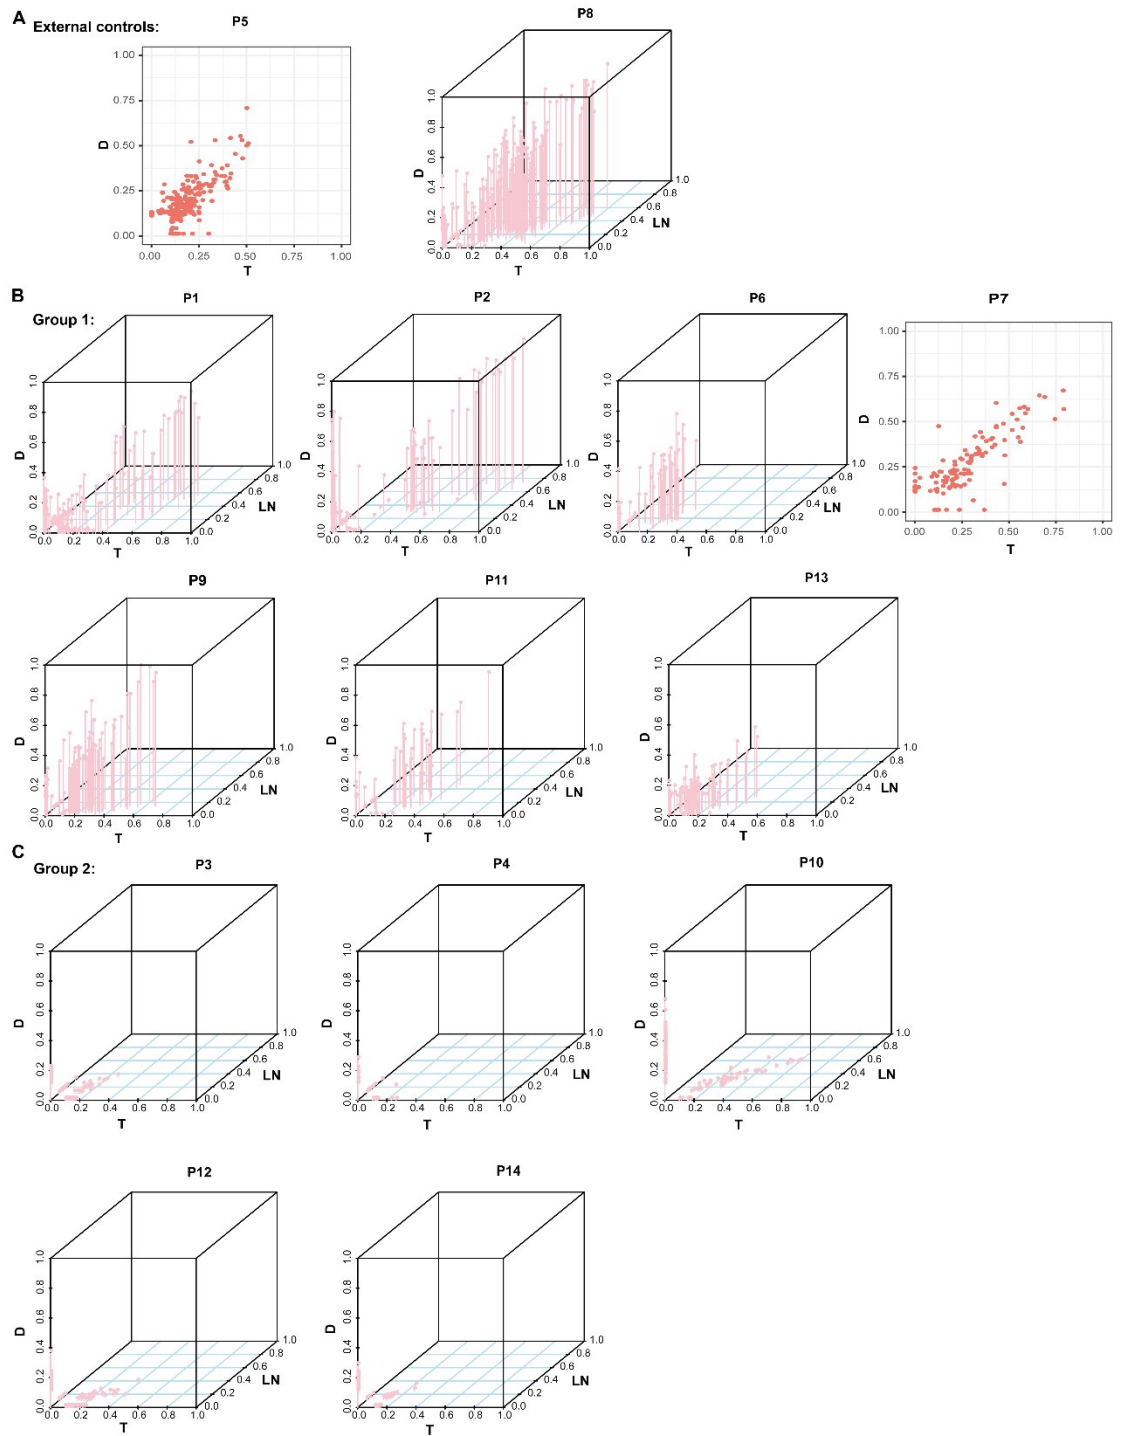

**Figure S4.** B-allele frequency (BAF) distribution showing the relationship of T, LN and D tumors within the same patient based on the BAFs in the (A) external controls, (B) group 1 and (C) group 2.

**A External controls**

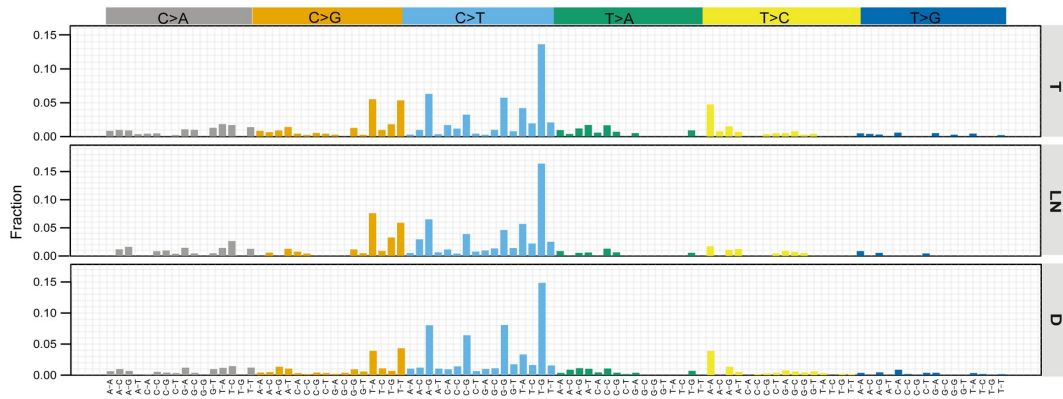

**B Group 1**

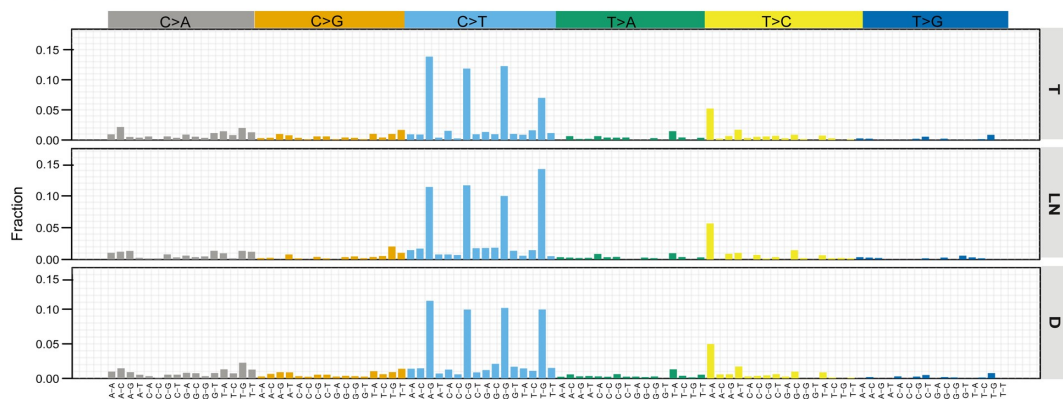

**C Group 2**

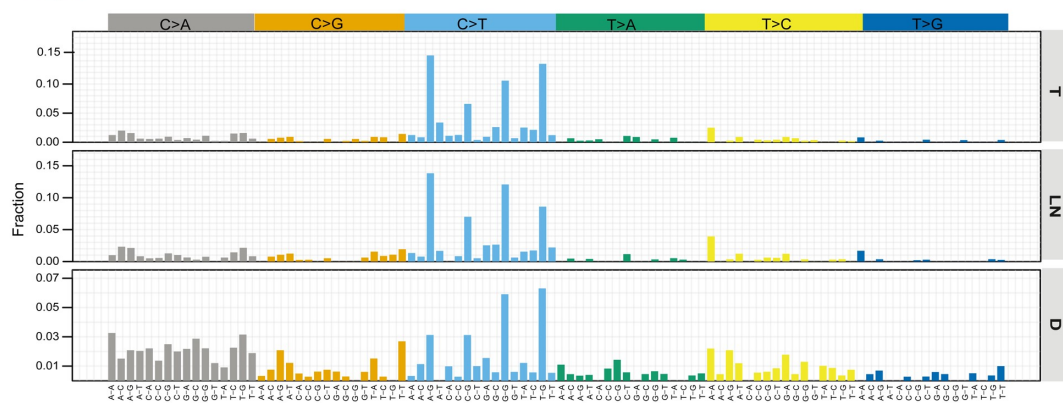

**Figure S5.** The 96 trinucleotide mutational spectra of T, LN and D tumors in the (A) external controls, (B) group 1 and (C) group 2.

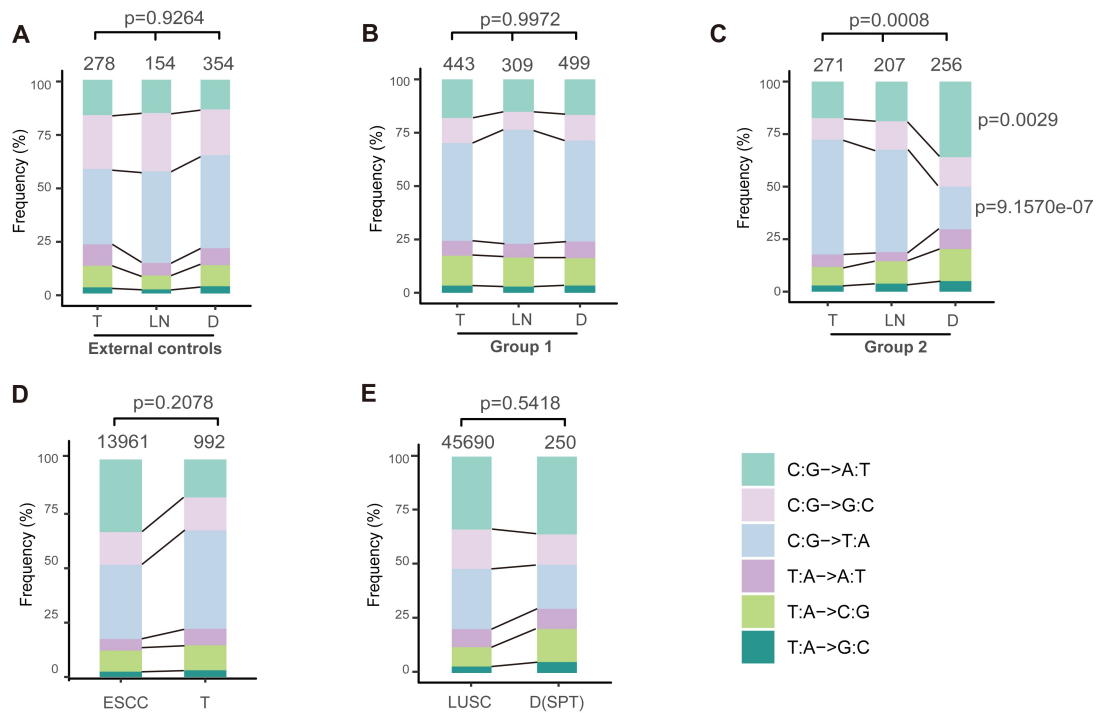

**Figure S6.** Analysis of mutation spectra in the external controls, group 1 and group 2.

The fraction of mutations in T, LN and D tumors is displayed by a stacked bar plot.

The differences between the spectra for mutations in T, LN and D tumors across the

(A) external controls, (B) group 1 and (C) group 2, as well as (D) T tumors in our

cohort and 96 esophageal squamous cell carcinoma (ESCC) samples from the TCGA,

and (E) D tumors in the group 2 and 177 lung squamous cell carcinoma (LUSC)

samples from the TCGA are analyzed. The number of mutations assessed is listed on

top of each bar.

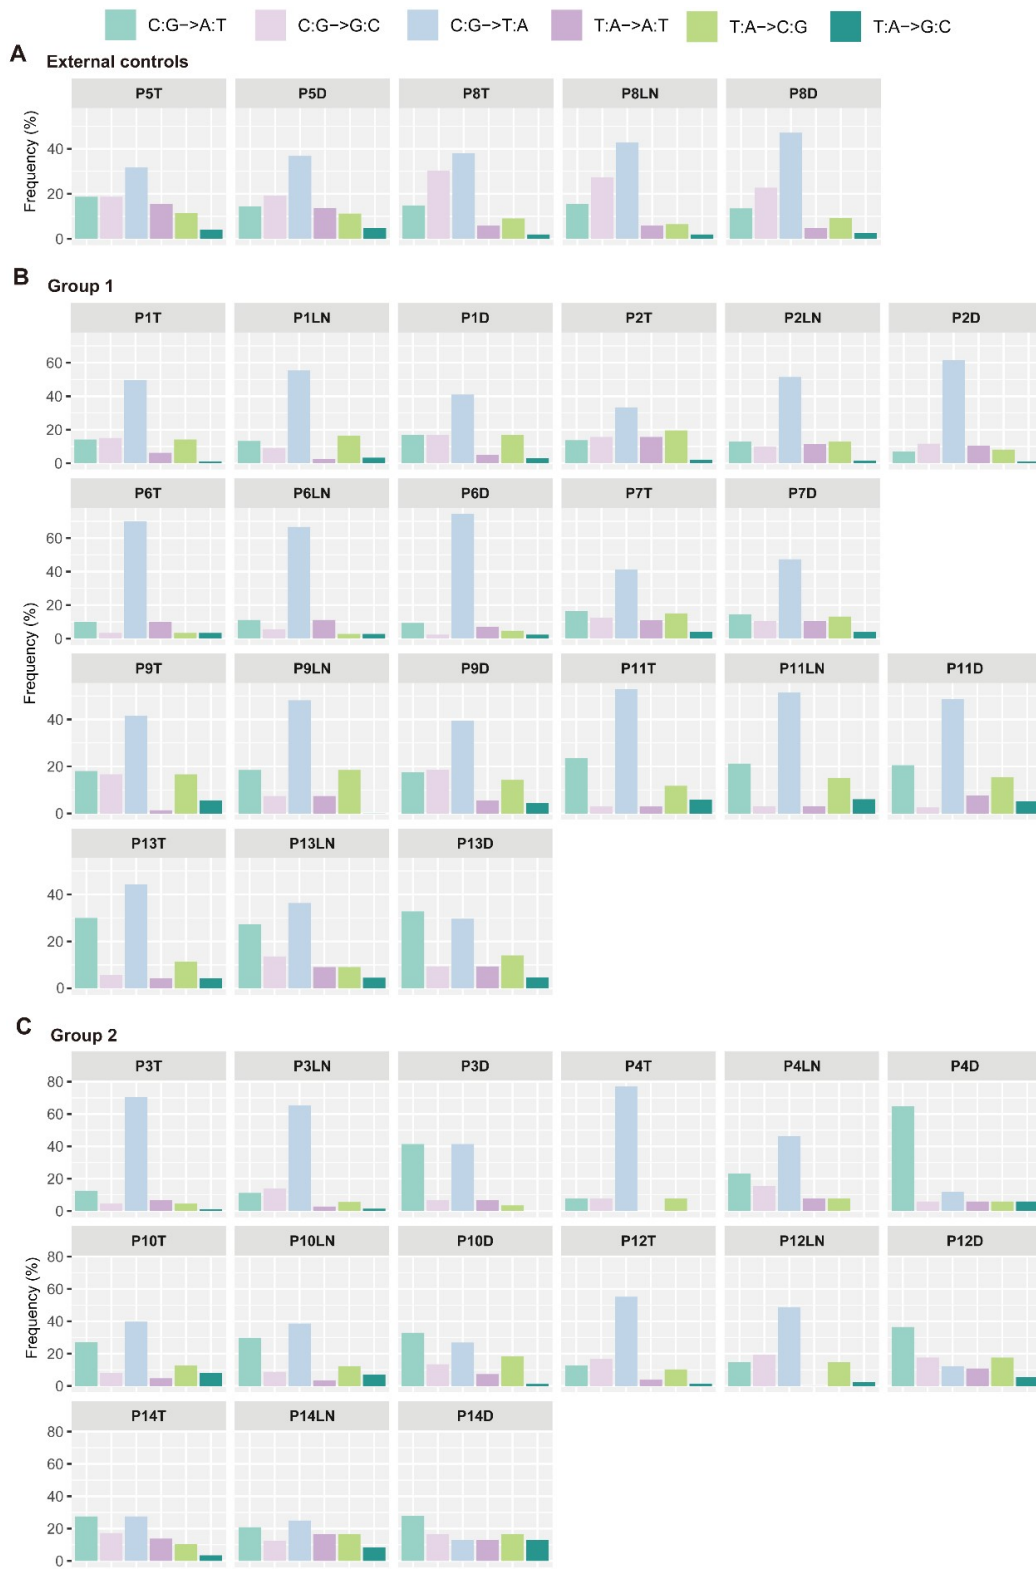

**Figure S7.** Mutation spectra of T, LN and D tumors in the (A) external controls, (B) group 1 and (C) group 2.



### A External controls

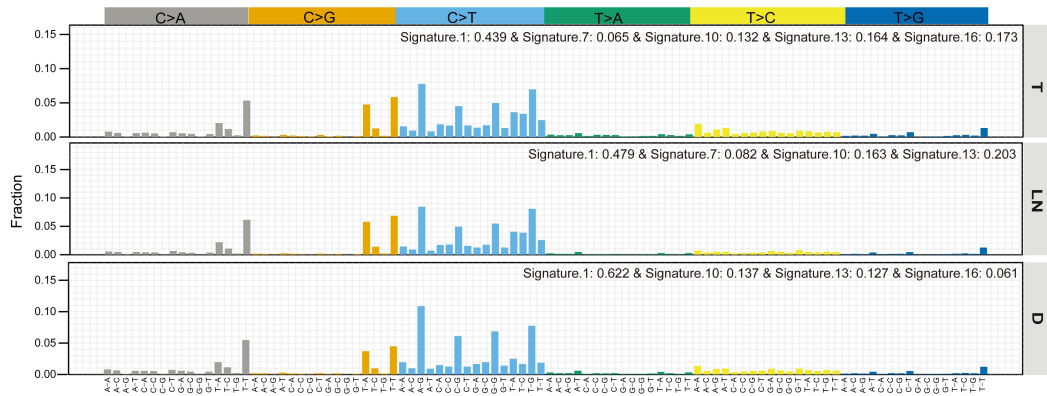

### B Group 1

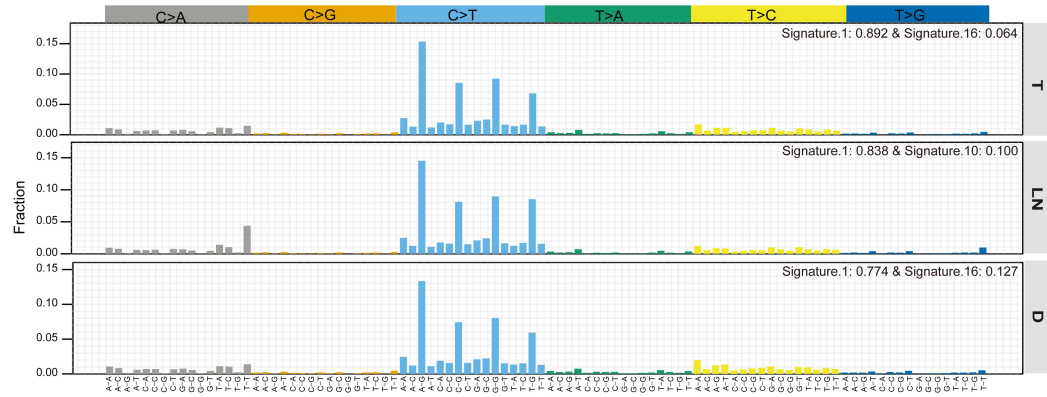

### C Group 2

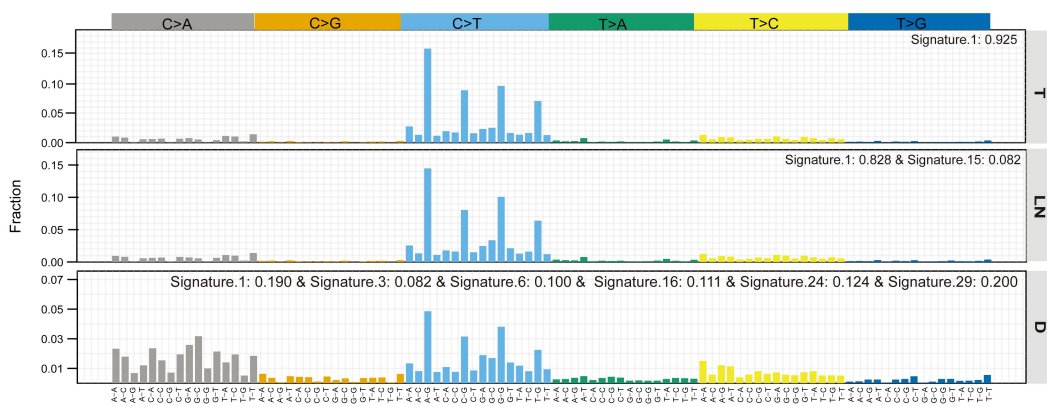

**Figure S8.** Mutational signatures of T, LN and D tumors in the (A) external controls, (B) group 1 and (C) group 2. The number in the upper right label is the contribution of signature for tumors.

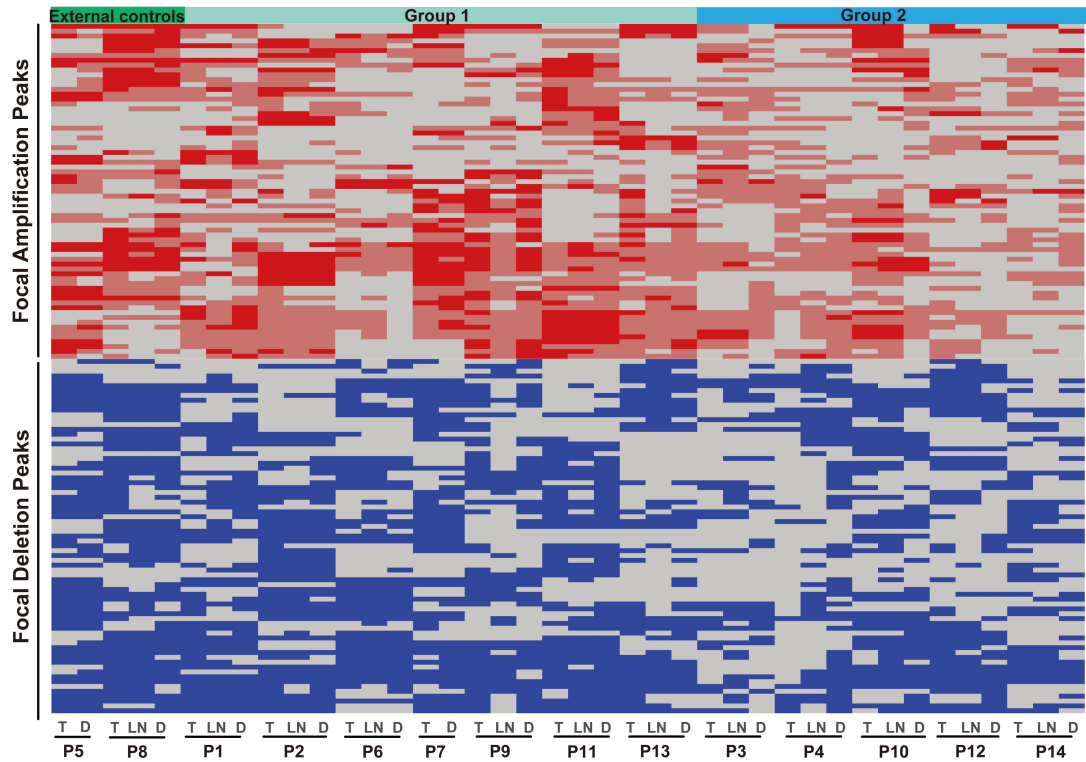

**Figure S9.** Heatmap showing the distribution of focal amplification and deletion peaks. Gray indicates the regions with no somatic copy-number alteration (SCNA) changes. Light red indicates the regions with SCNA changes, but not significant. Deep red indicates regions with significant SCNA changes. Blue indicates deletion regions.

**P14**

**T**

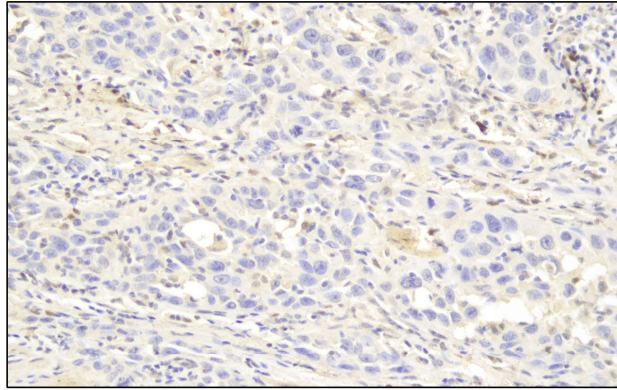

**LN**

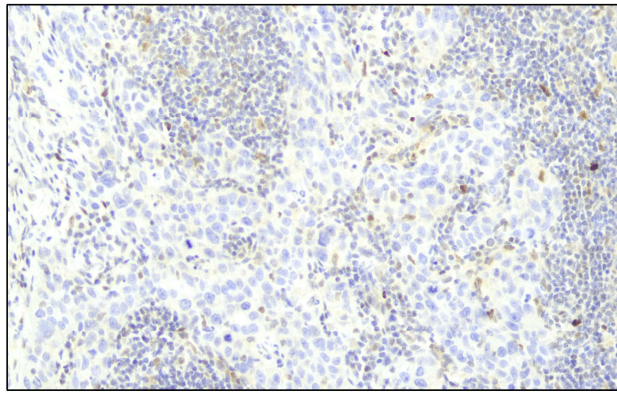

**D**

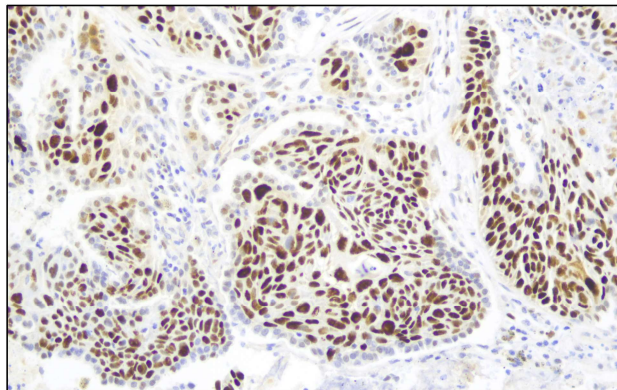

**Figure S10.** P53 immunostaining status in T, LN and D tumors of P14. Complete loss of p53 expression is observed in T and LN tumors, whereas diffuse and strong expression of p53 is observed in D tumor.

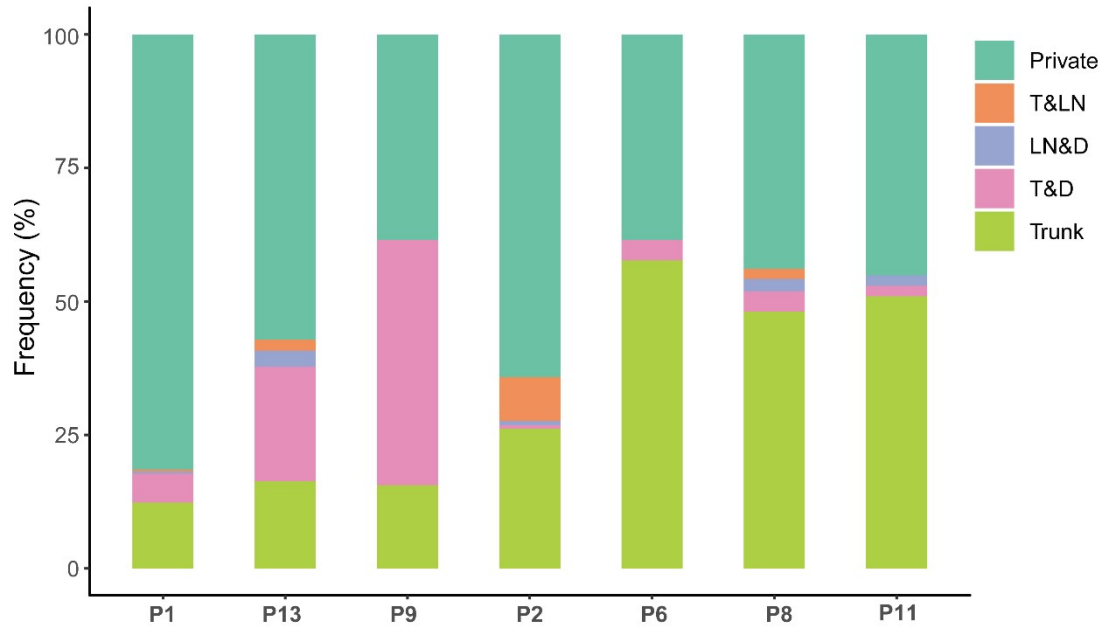

**Figure S11.** Percentage of truck, branch and private mutations in P1, P2, P6, P8, P9, P11 and P13.

**Table S1. Clinicopathological features of 14 patients in our cohort.**

| Patient ID | Smoking | Drinking | Histopathology of ESCC |           |           |     | Histopathology of LUSC |                 |          |                    |
|------------|---------|----------|------------------------|-----------|-----------|-----|------------------------|-----------------|----------|--------------------|
|            |         |          | Differentiation        | pT status | pN status | LVI | P53 in T/LN tumors     | Differentiation | Location | P53 in D tumor     |
| P1         | Yes     | Yes      | Moderate               | T3        | N3        | No  | Diffuse and strong     | Moderate        | LUL      | Diffuse and strong |
| P2         | Yes     | Yes      | Basaloid               | T3        | N1        | Yes | Diffuse and strong     | Basaloid        | LUL      | Diffuse and strong |
| P3         | Yes     | Never    | Poor                   | T3        | N1        | No  | Diffuse and strong     | Poor            | RUL      | Diffuse and strong |
| P4         | Yes     | Yes      | Moderate and basaloid  | T2        | N1        | No  | Complete loss          | Moderate        | RLL      | Complete loss      |
| P5         | Yes     | Yes      | Poor                   | T2        | N0        | No  | -                      | -               | -        | -                  |
| P6         | Never   | Never    | Poor                   | T3        | N2        | No  | Complete loss          | Poor            | RML      | Complete loss      |
| P7         | Yes     | Yes      | Moderate               | T2        | N0        | Yes | Diffuse and strong     | Moderate        | LUL      | Diffuse and strong |
| P8         | Yes     | Yes      | Moderate               | T3        | N3        | No  | -                      | -               | -        | -                  |
| P9         | Never   | Yes      | Moderate               | T3        | N2        | No  | Diffuse and strong     | Poor            | RUL      | Diffuse and strong |
| P10        | Yes     | Yes      | Moderate               | T3        | N3        | Yes | Diffuse and strong     | Moderate        | LLL      | Diffuse and strong |
| P11        | Yes     | Yes      | Poor                   | T3        | N2        | Yes | Complete loss          | Poor            | LLL      | Complete loss      |
| P12        | Never   | Never    | Moderate               | T3        | N1        | No  | Complete loss          | Moderate        | RML      | Complete loss      |
| P13        | Yes     | Yes      | Well                   | T3        | N2        | No  | Complete loss          | Well            | RUL      | Complete loss      |
| P14        | Yes     | Yes      | Poor                   | T3        | N1        | No  | Complete loss          | Moderate        | LUL      | Diffuse and strong |

ESCC, esophageal squamous cell carcinoma; LUSC, lung squamous cell carcinoma; LUL, left upper lobe; LLL, left lower lobe; RLL, right lower lobe; RML, right middle lobe; RUL, right upper lobe; LVI, lymphovascular invasion.
